# Supplementary material for: Robust detection of oncometabolic aberrations by 1H–13C heteronuclear single quantum correlation in intact biological specimens
Source: PubMed Central journal article supplement (PMC7316726; doi:10.1038/s42003-020-1055-5), 2020-06-25
Supplement: 42003_2020_1055_MOESM2_ESM.pdf [file 42003_2020_1055_MOESM2_ESM.pdf]

## **Description of Additional Supplementary Files**

**File Name:** **Supplementary Data 1**

**Description:** Metabolomics source data for Figure 3e, Supplementary Figures S1b, S4c, and S7f
